# Supplementary material for: GPX4 and FSP1, key ferroptosis regulators, are critical for T cell functions and CAR-T antitumor activity
Source: Research Square preprint supplement (doi:10.21203/rs.3.rs-5280443/v1), 2024-10-30

**Supplementary materials - Uncropped Western blots**

**Fig. 1g**

ACSL4 LOX15


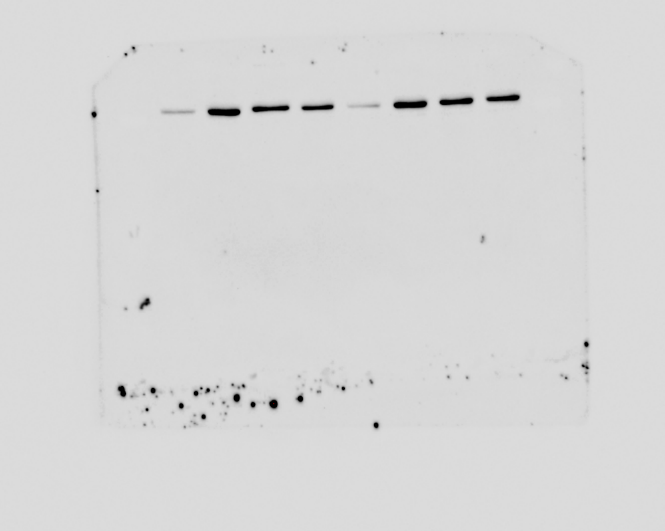

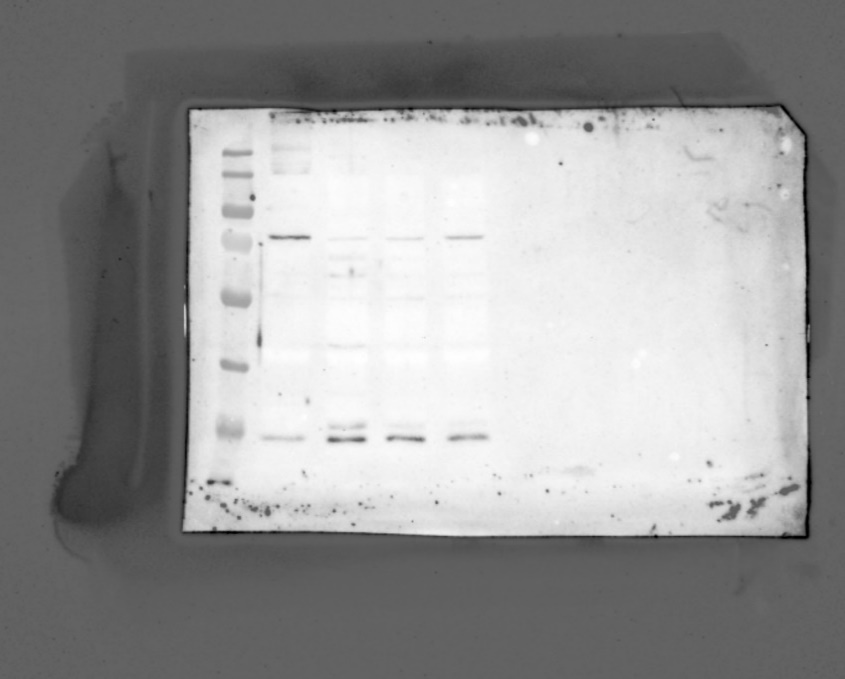


β-actin for ACSL4 β-actin for LOX15


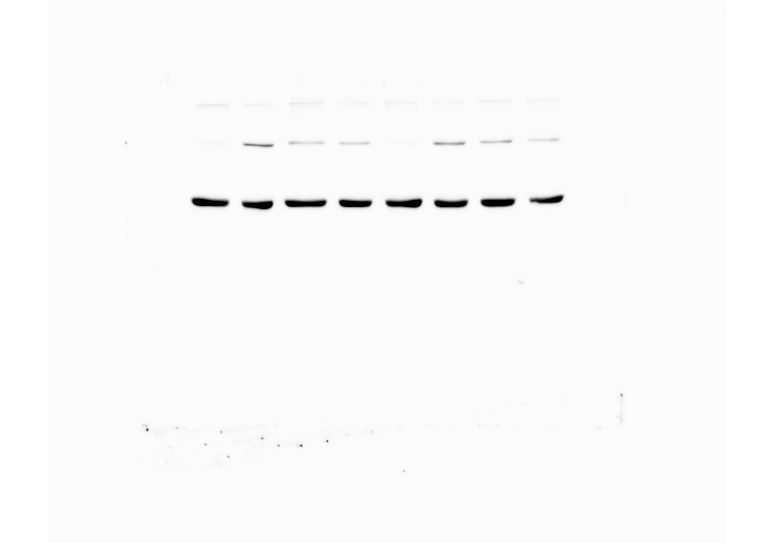

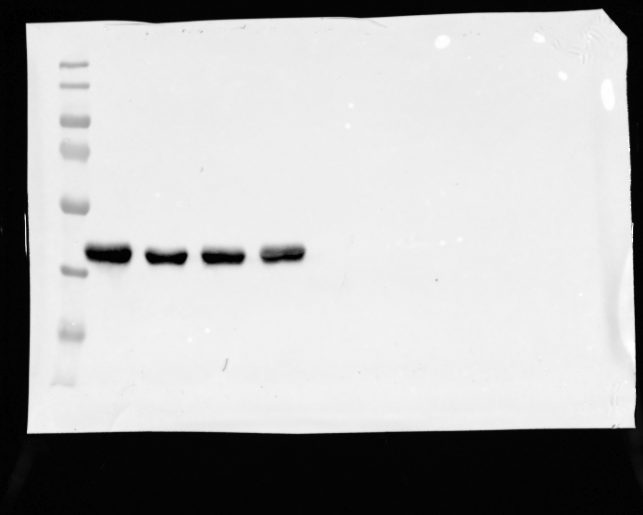


**Fig. 1h**

GPX4 β-actin for GPX4


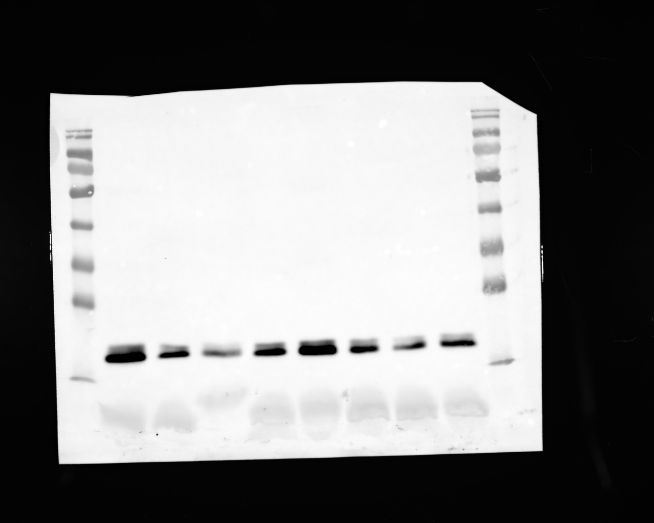

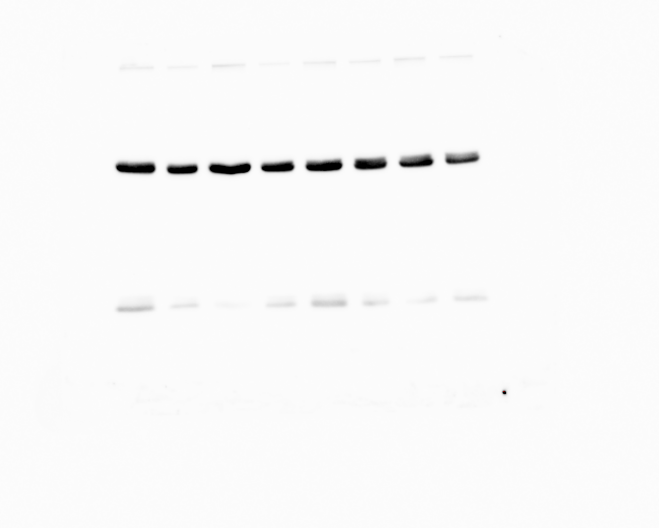


FSP1 β-actin for FSP1


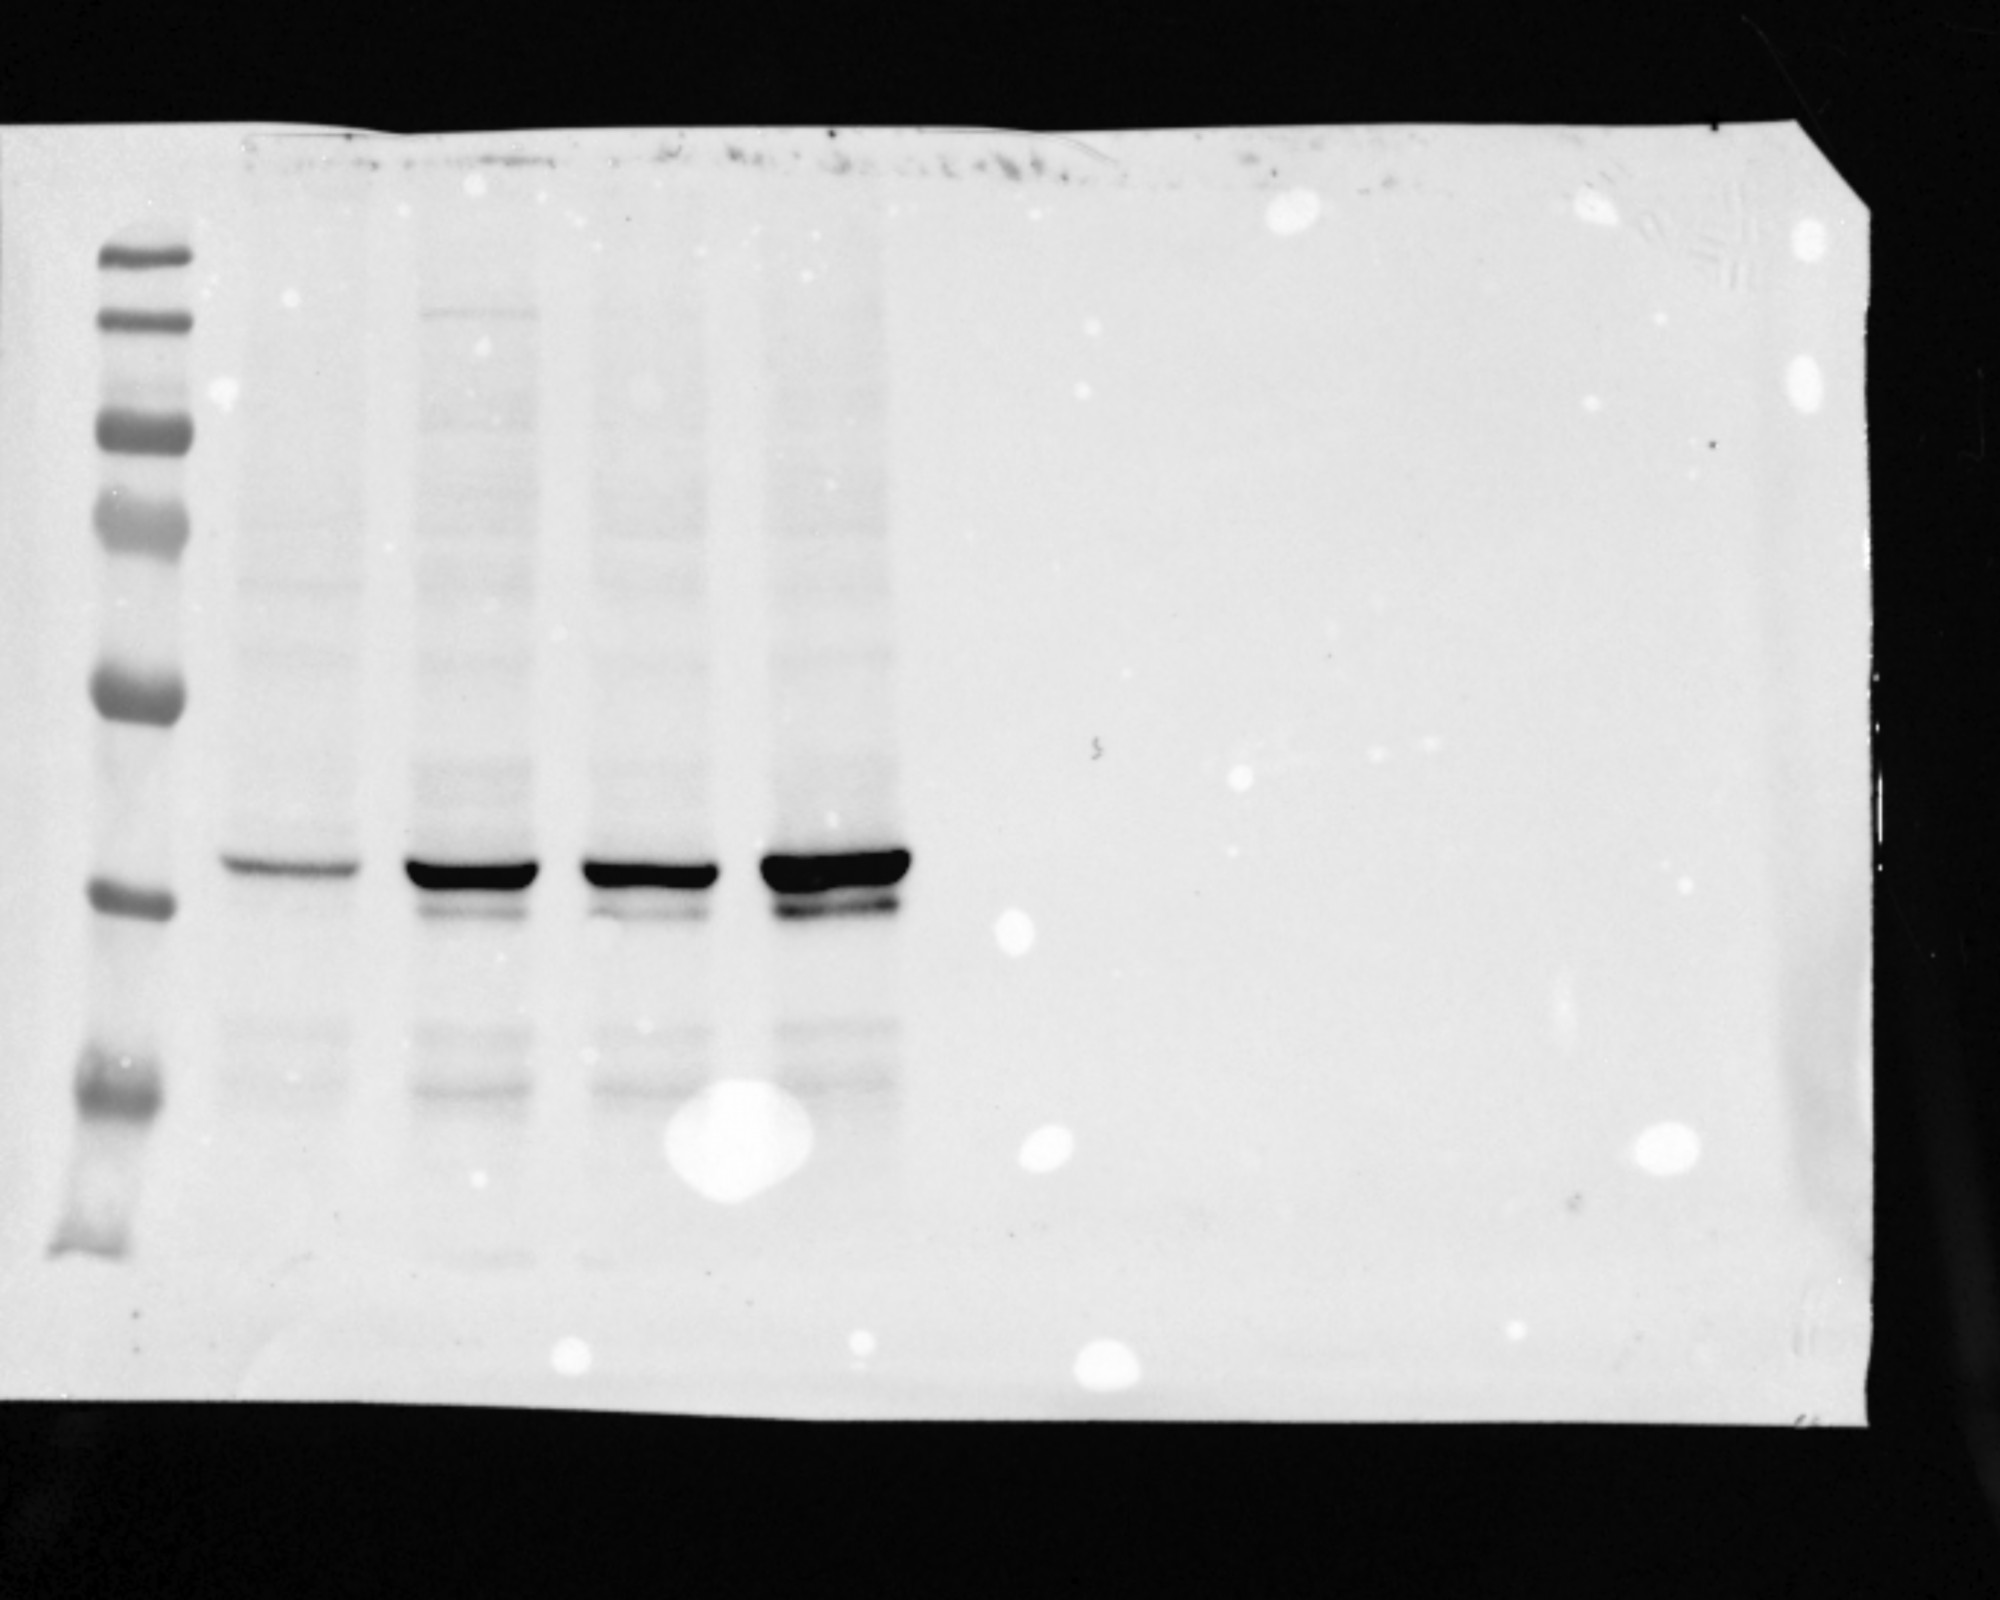

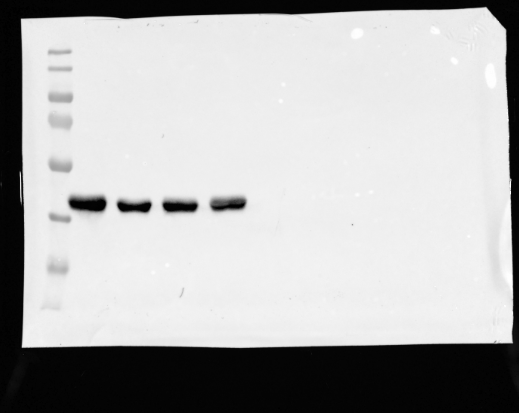


**Fig.3e**

Perforin β-actin


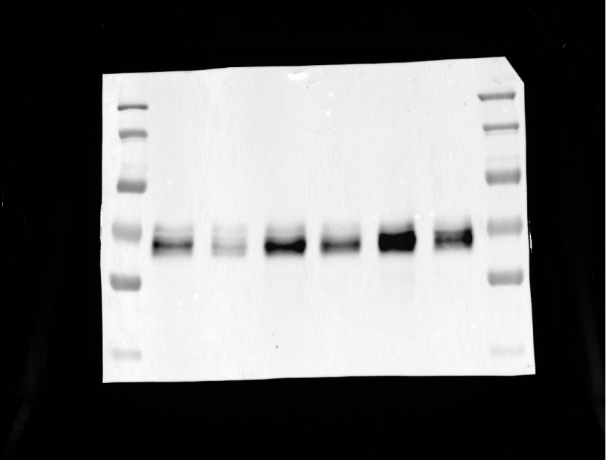

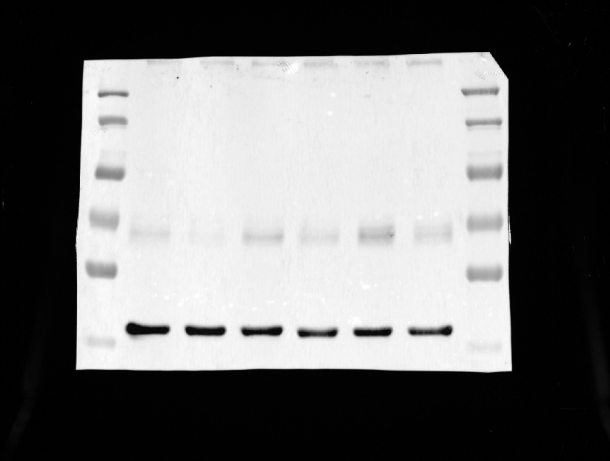


**Suppl. Fig. 1g**

GPX4 FSP1


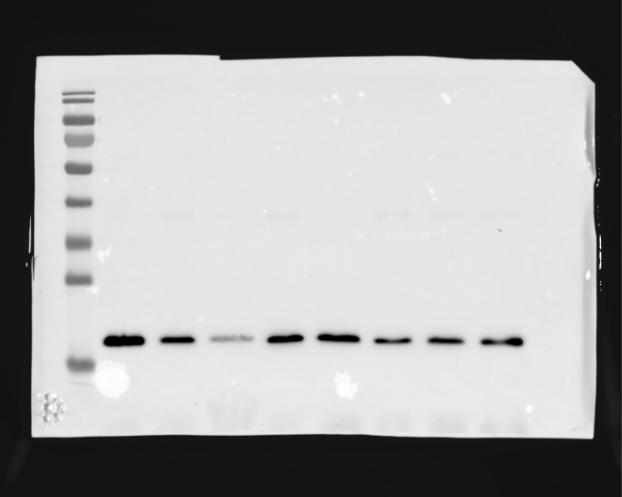

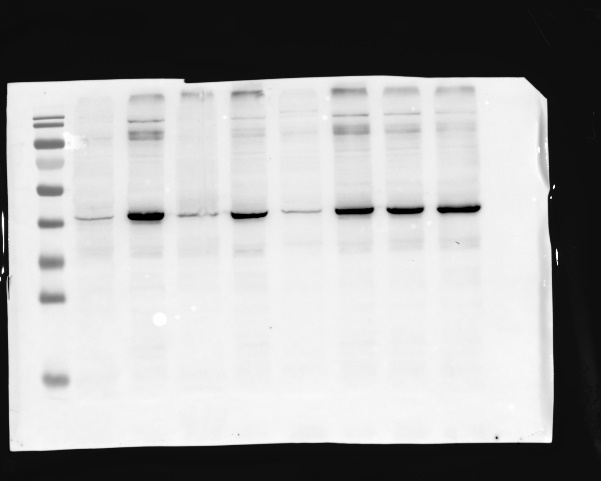


β-actin for GPX4 & FSP1


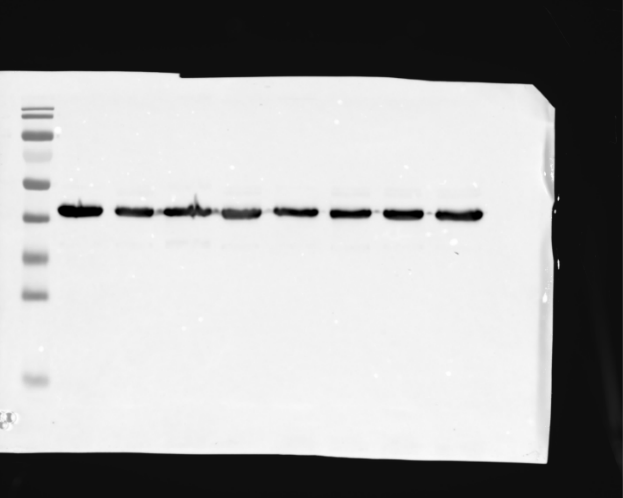


**Suppl. Fig. 2g**

LC3 β-actin


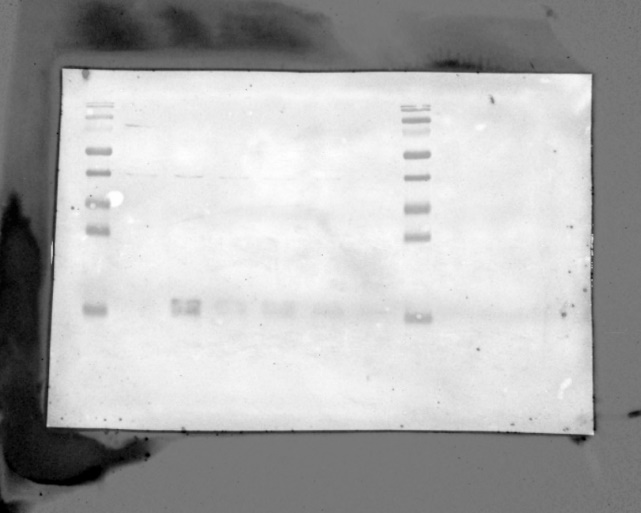

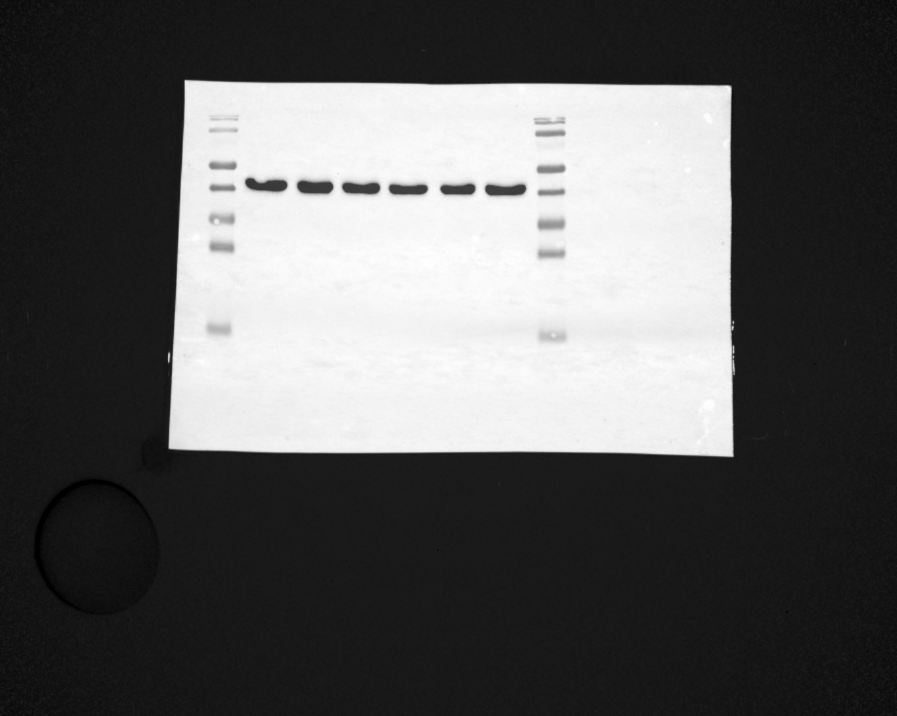

Supplement: Supplementary file 1 [file ce3f1ba55f31fb47756d1572.docx]
